# Supplementary material for: Acceleration of xenon kick-out exchange in a cryptophane host explained by ab initio simulation
Source: Royal Society of Chemistry journal article supplement (doi:10.1039/d4cp02378a), 2024-01-01
Supplement: d4cp02378a1.pdf [file d4cp02378a1.pdf]

# Acceleration of xenon kick-out exchange in a cryptophane host explained by ab initio simulation

Rodolphe Pollet,\* Jean-Pierre Dognon, and Patrick Berthault

*Université Paris-Saclay, CEA, CNRS, NIMBE, 91191, Gif-sur-Yvette, France.*

E-mail: rodolphe.pollet@cea.fr

## Supporting information

### 1 Optimization of the Xe pseudopotential

We have designed a new ultrasoft pseudopotential<sup>1</sup> for xenon which is an improved version of the one used in our previous simulations.<sup>2</sup> The valence space includes 18 electrons, namely  $4d^{10}5s^25p^6$ . During its construction, the PBE density functional approximation<sup>3</sup> was used and scalar relativistic effects included. The tests in this supplemental material and simulations in the article were performed with dispersion corrections according to the D3 scheme with zero-damping.<sup>4</sup> The corresponding pseudopotential file is available on Zenodo at the following address: <https://doi.org/10.5281/zenodo.11127120>.

## 2 Test on the Xe-Xe dimer

The xenon dimer was considered because of the degenerate exchange reaction to be studied. Tests reported in Table S1 show that the PBE-D3 calculation with the new ultrasoft pseudopotential can accurately predict the interaction energy  $E_{int}$  but slightly overestimates the equilibrium distance  $R_e$ .

Table S1: Data optimized with the new Xe pseudopotential at a plane-wave cutoff of 35 Ry compared with PBE-D3<sup>5</sup> and CCSD(T)<sup>6</sup> reference calculations as well as experiment<sup>7</sup>

|                   | $R_e$ (Å) | $E_{int}$ (kcal/mol) |
|-------------------|-----------|----------------------|
| PBE-D3 (35 Ry)    | 4.48      | -0.566               |
| PBE-D3 (ECP28MDF) | 4.50      | -0.546               |
| CCSD(T)           | 4.41      | -0.528               |
| Exp.              | 4.36      | -0.561               |

## 3 Tests on Xe-H<sub>2</sub>O complexes

Interaction between xenon and water was considered because of the degenerate exchange reaction occurs in aqueous solution. Tests reported in Table S2 show that the PBE-D3 calculation with the new ultrasoft pseudopotential can accurately predict the energetic order between three geometries of the Xe-H<sub>2</sub>O dimer, namely G5 (one H pointing toward Xe) < G2 (O pointing away from Xe) < G1 (O pointing toward Xe), with accurate distances as well.

Table S2: Data optimized with the new Xe pseudopotential at a plane-wave cutoff of 35 Ry for three geometries denoted as G5, G2 and G1. Corresponding CCSD(T) values<sup>8</sup> are given in parentheses.

|    | $R_e$ (Å)   | $E_{int}$ (kcal/mol) |
|----|-------------|----------------------|
| G5 | 4.03 (4.00) | -0.910 (-0.548)      |
| G2 | 4.00 (3.95) | -0.787 (-0.483)      |
| G1 | 3.74 (3.85) | -0.527 (-0.462)      |

## 4 Tests on Xe-CH<sub>4</sub> complexes

Tests reported in Table S3 show that the PBE-D3 calculation with the new ultrasoft pseudopotential can also accurately predict the energetic difference between two geometries of the Xe-CH<sub>4</sub> dimer, corresponding to vertex (along the vertex of the CH<sub>4</sub> tetrahedron) and facial (perpendicular to one of the faces of the CH<sub>4</sub> tetrahedron) approaches, with accurate distances as well.

Table S3: Data optimized with the new Xe pseudopotential at a plane-wave cutoff of 35 Ry for two geometries denoted as vertex and facial. Corresponding complete basis set CCSD(T) values<sup>9</sup> are given in parentheses.

|        | $R_e$ (Å)   | $E_{int}$ (kcal/mol) |
|--------|-------------|----------------------|
| vertex | 4.47 (4.50) | -0.529 (-0.387)      |
| facial | 4.07 (4.05) | -0.690 (-0.584)      |

## 5 Water distribution around free Xe

Radial distribution function of water molecules around the free xenon atom for the initial configuration, prior to the degenerate exchange, is shown in Figure S1. Integration under the first peak provides a hydration number of approximately 20.

## 6 Configurations during degenerate exchange

Configurations labelled A, B, C, D, and E on the free-energy profile included in the article are shown in figure S2.

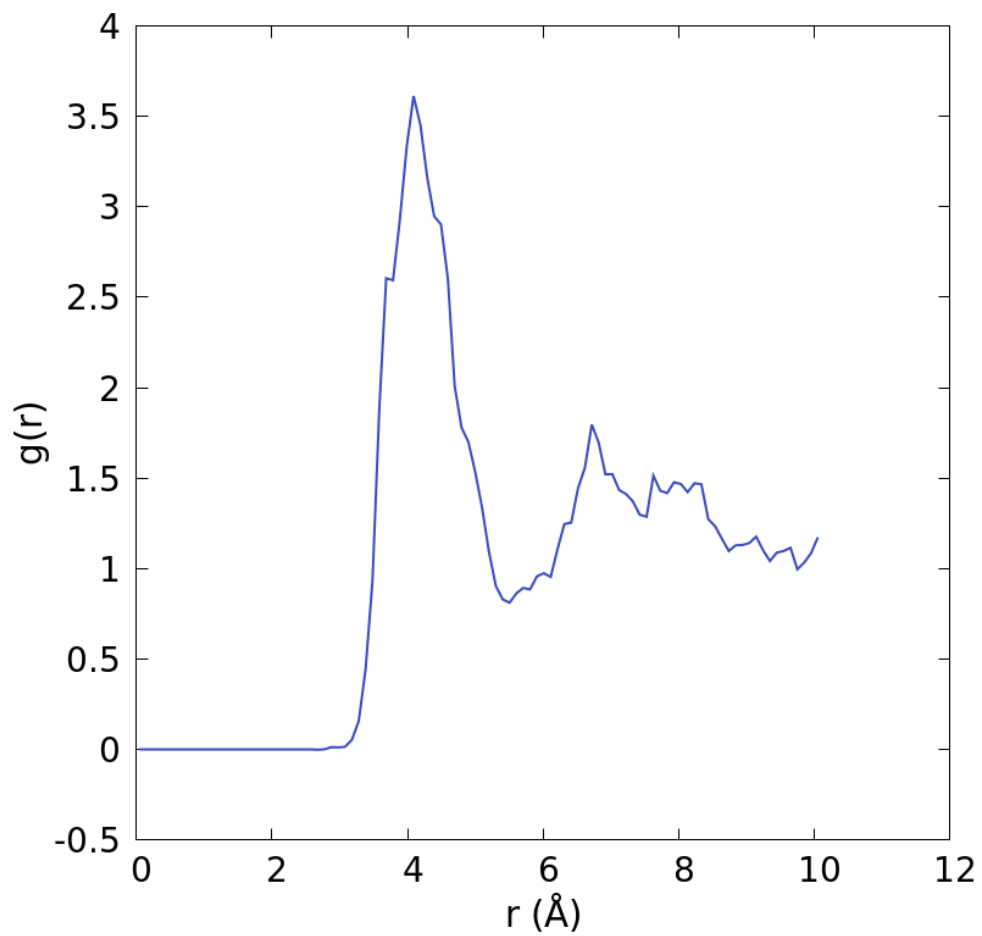

Figure S1: Radial distribution function of water oxygen atoms with respect to free Xe in the bulk

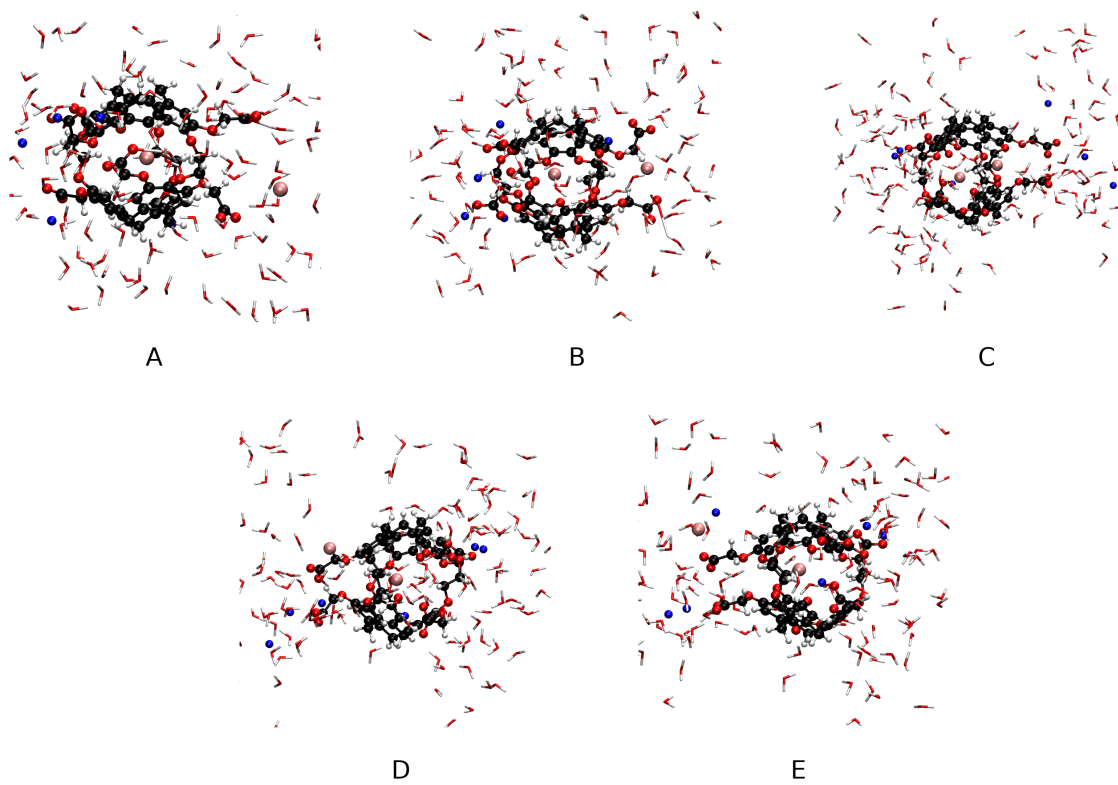

Figure S2: Representative configurations along the degenerate exchange reaction

## References

- (1) Vanderbilt, D. Soft self-consistent pseudopotentials in a generalized eigenvalue formalism. *Phys. Rev. B* **1990**, *41*, 7892–7895.
- (2) Pollet, R.; Dognon, J.-P.; Berthault, P. Isomer-Dependent Escape Rate of Xenon from a Water-Soluble Cryptophane Cage Studied by Ab Initio Molecular Dynamics. *ChemPhysChem* **2023**, *n/a*, e202300509.
- (3) Perdew, J. P.; Burke, K.; Ernzerhof, M. Generalized Gradient Approximation Made Simple. *Phys. Rev. Lett.* **1996**, *77*, 3865–3868, Erratum: (1997) Phys Rev Lett 78:1396.
- (4) Grimme, S.; Antony, J.; Ehrlich, S.; Krieg, H. A consistent and accurate ab initio parametrization of density functional dispersion correction (DFT-D) for the 94 elements H-Pu. *The Journal of Chemical Physics* **2010**, *132*, 154104.
- (5) Kovács, A.; Cz. Dobrowolski, J.; Ostrowski, S.; Rode, J. E. Benchmarking density functionals in conjunction with Grimme’s dispersion correction for noble gas dimers (Ne<sub>2</sub>, Ar<sub>2</sub>, Kr<sub>2</sub>, Xe<sub>2</sub>, Rn<sub>2</sub>). *International Journal of Quantum Chemistry* **2017**, *117*, e25358.
- (6) Rościszewski, K.; Paulus, B.; Fulde, P.; Stoll, H. Ab initio calculation of ground-state properties of rare-gas crystals. *Physical Review B* **1999**, *60*, 7905.
- (7) Ogilvie, J.; Wang, F. Y. Potential-energy functions of diatomic molecules of the noble gases I. Like nuclear species. *Journal of molecular structure* **1992**, *273*, 277–290.
- (8) Wen, Q.; Jäger, W. Rotational Spectroscopic and ab Initio Studies of the Xe- H<sub>2</sub>O van der Waals Dimer. *The Journal of Physical Chemistry A* **2006**, *110*, 7560–7567.
- (9) Alexander, W. A.; Troya, D. Theoretical Study of the Ar-, Kr-, and Xe- CH<sub>4</sub>,- CF<sub>4</sub> Intermolecular Potential-Energy Surfaces. *The Journal of Physical Chemistry A* **2006**, *110*, 10834–10843.
